# Supplementary material
Source: publisher figshare collection journal article supplement (https://karger.figshare.com/ndownloader/files/8712463)
Supplement: Supplementary file 1 [file 8712463]

**
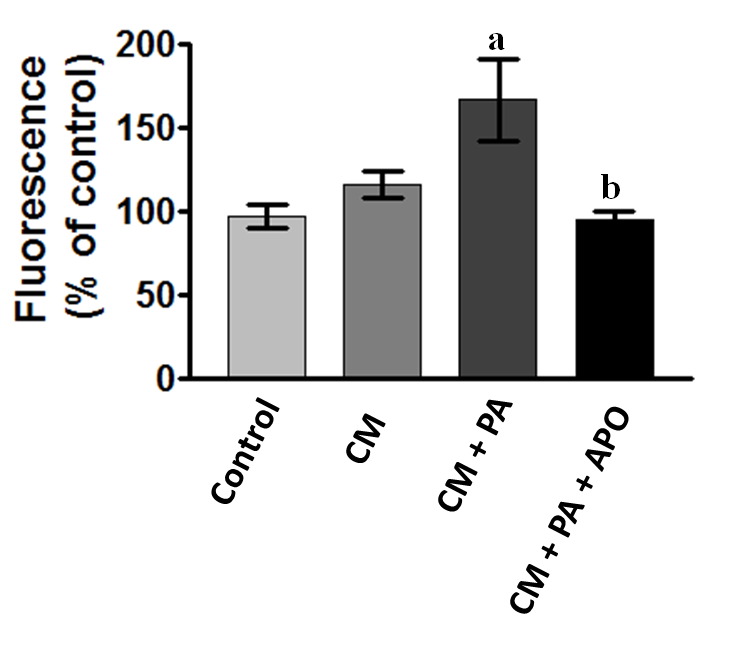
**

**Fig. S3. Quantification of superoxide production in rat aortic segments.** Aortic segments treated in CM supplemented with 100 µM palmitic acid in absence or presence of 500 µM apocynin were frozen in OCT. Twelve micron sections were incubated with 5 µM DHE and visualized by fluorescence microscopy. Superoxide production was evaluated by measuring the level of red fluorescence with Image J software. aStatistically different (*P* < 0.05) from control. bStatistically different (*P* < 0.05) from CM + PA.
